# Supplementary material for: Facilitated transport of small molecules and ions for energy-efficient membranes
Source: Royal Society of Chemistry journal article supplement (doi:10.1039/c4cs00215f), 2014-10-09
Supplement: c4cs00215f1.pdf [file c4cs00215f1.pdf]

# Supplementary information

## **Facilitated transport of small molecules and ions for energy-efficient membranes**

Yifan Li<sup>ab</sup>, Shaofei Wang<sup>ab</sup>, Guangwei He<sup>ab</sup>, Hong Wu<sup>ab</sup>, Fusheng Pan<sup>ab</sup> and

Zhongyi Jiang<sup>\*ab</sup>

a. Key Laboratory for Green Chemical Technology of Ministry of Education, School of Chemical Engineering and Technology, Tianjin University, Tianjin 300072, China.

b. Collaborative Innovation Center of Chemical Science and Engineering (Tianjin), Tianjin 300072, China

\*Corresponding author.

Tel. /Fax.: +862 223 500086

*E-mail address:* zhyjiang@tju.edu.cn.

**Table S1. A summary of facilitated CO<sub>2</sub> transport membranes involving nucleophilic addition reaction**

| Membrane                                              | CO <sub>2</sub> permeance (GPU) or permeability (Barrer) | CO <sub>2</sub> /N <sub>2</sub> selectivity | Testing conditions <sup>a</sup>                                            | References |
|-------------------------------------------------------|----------------------------------------------------------|---------------------------------------------|----------------------------------------------------------------------------|------------|
| <b>Polymeric membranes</b>                            |                                                          |                                             |                                                                            |            |
| PVAm/PPO                                              | 440 GPU                                                  | 183                                         | Mixed gas (10 vol%CO <sub>2</sub> ), 25°C, 5 bar                           | 1          |
| PVAm-EDA /PSf                                         | 607 GPU                                                  | 106                                         | Mixed gas (15 vol%CO <sub>2</sub> ), 25°C, 1.1 bar                         | 2          |
| PVI-Zn/PSf                                            | 1120 GPU                                                 | 83                                          | Mixed gas (15 vol%CO <sub>2</sub> ), 25°C, 1.1 bar                         | 3          |
| PVAm-MC/PS                                            | 1180 GPU                                                 | 410                                         | Mixed gas (15 vol%CO <sub>2</sub> ), 25°C, 1.1 bar                         | 4          |
| DNMDAm-DGBAmE-TMC/PDMS/PSf                            | 1600 GPU                                                 | 138                                         | Mixed gas (15 vol%CO <sub>2</sub> ), 25°C, 1.1 bar                         | 5          |
| DAmBS-DGBAmE-TMC/PDMS/PSf                             | 5830 GPU                                                 | 86                                          | Mixed gas (15 vol%CO <sub>2</sub> ), 25°C, 1.1 bar                         | 6          |
| PVAm-PIP /PSf                                         | 6500 GPU                                                 | 277                                         | Mixed gas (15 vol%CO <sub>2</sub> ), 25°C, 1.1 bar                         | 7          |
| PAA-C <sub>3</sub> H <sub>7</sub> -PVA                | 297 Barrer                                               | 341                                         | Mixed gas (20 vol%CO <sub>2</sub> + 40 vol% H <sub>2</sub> ), 110°C, 2 atm | 8          |
| PANI /PP                                              | 3460 Barrer                                              | 540 <sup>b</sup>                            | Mixed gas (10 vol%CO <sub>2</sub> ), 25°C, 1.28 bar                        | 9          |
| PAA-C <sub>3</sub> H <sub>7</sub> -PVA-Poly(siloxane) | 6500 Barrer                                              | >650                                        | Mixed gas (20 vol%CO <sub>2</sub> + 40 vol% H <sub>2</sub> ), 110°C, 2 atm | 10         |
| <b>Mixed matrix membranes</b>                         |                                                          |                                             |                                                                            |            |
| PVAm-PANI /PSf                                        | 1200 GPU                                                 | 120                                         | Mixed gas (15 vol%CO <sub>2</sub> ), 25°C, 1.1 bar                         | 11         |
| PVAm-PVP@PANI /PSf                                    | 3080 GPU                                                 | 240                                         | Mixed gas (15 vol%CO <sub>2</sub> ), 25°C, 1.1 bar                         | 12         |
| PEI-hydrotalcite                                      | 5693 GPU                                                 | 268                                         | Mixed gas (15 vol%CO <sub>2</sub> ), 25°C, 1.1 bar                         | 13         |
| Pebax-PEI@MCM41                                       | 1521 Barrer                                              | 102                                         | Pure gas, 25°C, 3 bar                                                      | 14         |
| SPEEK-PEI@TiO <sub>2</sub>                            | 1629 Barrer                                              | 64                                          | Pure gas, 25°C, 3 bar                                                      | 15         |

<sup>a</sup> All the membranes were tested at humidified state.

<sup>b</sup> The value is actually CO<sub>2</sub>/CH<sub>4</sub> selectivity.

**Table S2. Typical facilitated CO<sub>2</sub> transport membranes containing amino acid ionic liquids**

| Membrane                             | CO <sub>2</sub> permeability (Barrer) | CO <sub>2</sub> /N <sub>2</sub> selectivity | Testing conditions                                                    | References |
|--------------------------------------|---------------------------------------|---------------------------------------------|-----------------------------------------------------------------------|------------|
| [P <sub>4444</sub> ][Gly]            | 5000                                  | 48                                          | Mixed gas (10 vol%CO <sub>2</sub> ), 100°C, 1 atm, dry membrane       | 16         |
| [P <sub>66614</sub> ][Gly]           | 6900                                  | 100                                         | Mixed gas (10 vol%CO <sub>2</sub> ), 100°C, 1 atm, dry membrane       | 17         |
| [Emim][Gly]                          | 8300                                  | 146                                         | Mixed gas (10 vol%CO <sub>2</sub> ), 100°C, 1 atm, dry membrane       | 16         |
| [P <sub>4444</sub> ][mGly]           | 10000                                 | 53                                          | Mixed gas (10 vol%CO <sub>2</sub> ), 100°C, 1 atm, dry membrane       | 17         |
| [P <sub>4444</sub> ][Pro]            | 10600                                 | 100                                         | Mixed gas (10 vol%CO <sub>2</sub> ), 100°C, 1 atm, dry membrane       | 18         |
|                                      | 30000                                 | 200                                         | Mixed gas (2 vol%CO <sub>2</sub> ), 100°C, 1 atm, humidified membrane | 18         |
| [P <sub>4444</sub> ][Pro] –PVP (gel) | 7000                                  | 170                                         | Mixed gas (2.5 vol%CO <sub>2</sub> ), 100°C, 1 atm, dry membrane      | 19         |

<sup>a</sup> The value is actually CO<sub>2</sub>/CH<sub>4</sub> selectivity.  
<sup>b</sup> Values are approximated from plots.

**Table S3. Typical facilitated olefin transport membranes suppressing silver reduction**

| Polymer    | Silver salt       | Additive                                        | Key anti-reduction species                              | References |
|------------|-------------------|-------------------------------------------------|---------------------------------------------------------|------------|
| PVP        | AgNO <sub>3</sub> | —                                               | NO <sub>3</sub> <sup>-</sup>                            | 20         |
| POZ        | AgNO <sub>3</sub> | BMIm <sup>+</sup> NO <sub>3</sub> <sup>-</sup>  | BMIm <sup>+</sup> NO <sub>3</sub> <sup>-</sup>          | 21         |
| PVP        | AgBF <sub>4</sub> | dioctyl phthalate/HBF <sub>4</sub>              | dioctyl phthalate                                       | 22         |
| PEP        | AgBF <sub>4</sub> | —                                               | PEP                                                     | 23         |
| Pebax 2533 | AgBF <sub>4</sub> | H <sub>2</sub> O <sub>2</sub> /HBF <sub>4</sub> | H <sub>2</sub> O <sub>2</sub>                           | 24         |
| POZ        | AgBF <sub>4</sub> | Al(NO <sub>3</sub> ) <sub>3</sub>               | NO <sub>3</sub> <sup>-</sup>                            | 25         |
| PES/PEO    | AgBF <sub>4</sub> | Cu(NO <sub>3</sub> ) <sub>2</sub>               | NO <sub>3</sub> <sup>-</sup>                            | 26         |
| PVDF-HFP   | AgBF <sub>4</sub> | BMIm <sup>+</sup> BF <sub>4</sub> <sup>-</sup>  | PVDF-HFP BMIm <sup>+</sup> BF <sub>4</sub> <sup>-</sup> | 27         |

## References

- 1 M. Sandru, S. H. Haukebo and M. B. Hagg, *J. Membr. Sci.*, 2010, **346**, 172-186.
- 2 S. Yuan, Z. Wang, Z. Qiao, M. Wang, J. Wang and S. Wang, *J. Membr. Sci.*, 2011, **378**, 425-437.
- 3 K. Yao, Z. Wang, J. Wang and S. Wang, *Chem. Commun.*, 2012, **48**, 1766-1768.
- 4 Z. Ma, z. Qiao, Z. Wang, X. Cao, Y. He, J. Wang and S. Wang, *RSC Adv.*, 2014, **4**, 21313-21317.
- 5 S. Li, Z. Wang, X. Yu, J. Wang and S. Wang, *Adv. Mater.*, 2012, **24**, 3196-3200.
- 6 M. Wang, Z. Wang, S. Li, C. Zhang, J. Wang and S. Wang, *Energy Environ. Sci.*, 2013, **6**, 539-551.
- 7 Z. Qiao, Z. Wang, C. Zhang, S. Yuan, Y. Zhu, J. Wang and S. Wang, *AIChE J.*, 2013, **59**, 215-228.
- 8 Y. Zhao and W. S. Winston Ho, *J. Membr. Sci.*, 2012, **415-416**, 132-138.
- 9 N. V. Blinova and F. Svec, *J. Membr. Sci.*, 2012, **423-424**, 514-521.
- 10 Y. Zhao and W. S. W. Ho, *Ind. Eng. Chem. Res.*, 2013, **52**, 8774-8782.
- 11 J. Zhao, Z. Wang, J. Wang and S. Wang, *J. Membr. Sci.*, 2012, **403-404**, 203-215.
- 12 S. Zhao, Z. Wang, Z. Qiao, X. Wei, C. Zhang, J. Wang and S. Wang, *J. Mater. Chem. A*, 2013, **1**, 246-249.
- 13 J. Liao, Z. Wang, C. Gao, S. Li, Z. Qiao, M. Wang, S. Zhao, X. Xie, J. Wang and S. Wang, *Chemical Science*, 2014, **5**, 2843-2849.
- 14 H. Wu, X. Li, Y. Li, S. Wang, R. Guo, Z. Jiang, C. Wu, Q. Xin and X. Lu, *J. Membr. Sci.*, 2014, **465**, 78-90.
- 15 Q. Xin, H. Wu, Z. Jiang, Y. Li, S. Wang, Q. Li, X. Li, X. Lu, X. Cao and J. Yang, *J. Membr. Sci.*, 2014, **467**, 23-35.
- 16 S. Kasahara, E. Kamio, T. Ishigami and H. Matsuyama, *Chem. Commun.*, 2012, **48**, 6903.
- 17 S. Kasahara, E. Kamio and H. Matsuyama, *J. Membr. Sci.*, 2014, **454**, 155-162.
- 18 S. Kasahara, E. Kamio, T. Ishigami and H. Matsuyama, *J. Membr. Sci.*, 2012, **415-416**, 168-175.
- 19 S. Kasahara, E. Kamio, A. Yoshizumi and H. Matsuyama, *Chem. Commun.*, 2014, **50**, 2996-2999.
- 20 J. H. Kim, C. K. Kim, J. Won and Y. S. Kang, *J. Membr. Sci.*, 2005, **250**, 207-214.
- 21 S. W. Kang, J. Hong, K. Char, J. H. Kim, J. Kim and Y. S. Kang, *Desalination*, 2008, **233**, 327-332.
- 22 B. Jose, J. H. Ryu, B. G. Lee, H. Lee, Y. S. Kang and H. S. Kim, *Chem. Commun.*, 2001, 2046-2047.
- 23 S. W. Kang, J. H. Kim, K. S. Oh, J. Won, K. Char, H. S. Kim and Y. S. Kang, *J. Membr. Sci.*, 2004, **236**, 163-169.
- 24 T. C. Merkel, R. Blanc, I. Ciobanu, B. Firat, A. Suwarlim and J. Zeid, *J. Membr. Sci.*, 2013, **447**, 177-189.
- 25 S. W. Kang, J. H. Kim, J. Won and Y. S. Kang, *J. Membr. Sci.*, 2013, **445**, 156-159.
- 26 M. Esmacili, S. S. Madaeni and J. Barzin, *Sep. Purif. Technol.*, 2013, **103**, 289-305.
- 27 M. Fallanza, A. Ortiz, D. Gorri and I. Ortiz, *J. Membr. Sci.*, 2013, **444**, 164-172.
